# Supplementary material
Source: publisher site journal article supplement (https://www.dovepress.com/article/266676)
Supplement: Supplementary file 1 [file get_supplementary_file.php]

**Optimization the number of extrusion cycles**

To determine the optimum number of extrusion cycles, the blank liposomes prepared with the same technique as aforementioned were pushed through an extruder 100-nm polycarbonate filters (a mini extruder, Avanti, Canada) 15 times at flow rate 0.5, 1 and 2 mL/minute and 25 °C. The blank liposomes were diluted with purified water to diminish the effect of the contaminants in the suspension. Final concentration of lipids in water was 5% w/v.

**The results**

Figure S-1: Influence number of extrusion cycle on the average particle size of the blank liposomes (Mean ± SD, n = 5).

Figure S-2: Influence number of extrusion cycle on the polydispersity index of the blank liposomes (Mean ± SD, n = 5).

The least average particle size was found after three extrusion cycles, Figure S-1.The change of flow rate (0.5-1.5 mL/min.) has no effect on particle size. However, the lowest average polydispersity index was found after six extrusion cycles, Figure S-2.
